# Supplementary material for: Structure, morphology and catalytic properties of pure and alloyed Au–ZnO hierarchical nanostructures
Source: Royal Society of Chemistry journal article supplement (doi:10.1039/c5ra06910f), 2015-01-01
Supplement: c5ra06910f1.pdf [file c5ra06910f1.pdf]

Supporting information for

**Structure, morphology and catalytic properties of pure and alloyed Au-ZnO  
hierarchical nanostructures**

M. Cargnello,<sup>a,†</sup> D. Sala,<sup>a,b</sup> C. Chen,<sup>c</sup> R. J. Gorte,<sup>c</sup> M. D'Arienzo<sup>b</sup> and C. B. Murray<sup>a,d,\*</sup>

<sup>a</sup>*Department of Chemistry, University of Pennsylvania, Philadelphia, PA (USA), 19104*

<sup>b</sup>*INSTM, Department of Materials Science, University of Milano-Bicocca, Via R. Cozzi 53, I-20125  
Milano, Italy*

<sup>3</sup>*Department of Chemical and Biomolecular Engineering, University of Pennsylvania, Philadelphia, PA  
(USA), 19104*

<sup>4</sup>*Department of Materials Science and Engineering, University of Pennsylvania, Philadelphia, PA  
(USA), 19104*

<sup>†</sup>*Present address: Department of Chemical Engineering and SUNCAT Center for Interface Science and  
Catalysis, Stanford University, Stanford, CA 94305 (USA).*

e-mail: cbmurray@sas.upenn.edu

## Content:

### Experimental Procedures

Fig. S1: TEM images of several batches of Au@ZnO structures

Fig. S2: X-ray diffraction patterns of the prepared samples

Fig. S3: representative TEM images of the starting seeds

Fig. S4: representative TEM images of Au@ZnO-Al<sub>2</sub>O<sub>3</sub> after catalytic reaction

## ***Experimental Procedures***

### *Synthesis of the Au seeds*

Au NCs were prepared according to the procedure reported by Peng et al.<sup>1</sup> 1 mmol *tert*-butylamine-borane complex (97%, Sigma-Aldrich) was dissolved in oleylamine (80-90%, Acros Organics, 2 mL) and 1,2,3,4-tetrahydronaphthalene (tetralin, Acros Organics, 2 mL) by sonication. This solution was swiftly injected into a solution of HAuCl<sub>4</sub> (200 mg) in 20 mL oleylamine (80-90%, Acros Organics) and 20 mL 1,2,3,4-tetrahydronaphthalene (tetralin, Acros Organics) kept at RT (~22 °C). Reduction occurred almost immediately as evidenced by a change in color from orange to dark red, but reaction was left stirring in air for 1 h. Then, the flask was sealed and flushed with N<sub>2</sub>, and temperature increased to 60 °C. At this point, 100 µL of 1-dodecanethiol (>98%, Sigma-Aldrich) were slowly added. At the end of the addition (~3 minutes), flask was cooled and opened to air. Particles were then purified by three rounds of precipitation in isopropanol/ethanol 3/1 (40 mL) and centrifugation (8000 rpm, 3 minutes) with dissolution in hexanes after each step. Finally, particles were dissolved in hexane at a concentration of Au of ~5 mg mL<sup>-1</sup>.

### *Synthesis of Au@ZnO structures*

2 mL of the Au seeds were mixed with 1 mmol of Zn acetate dihydrate (>98%, Sigma-Aldrich) and 2 mmol of oleic acid (90%, Sigma-Aldrich) in 1-octadecene (12.5 mL). Hexanes from the Au solution was slowly removed at RT under vacuum, and mixture was then further evacuated at 80 °C for 30 minutes. The flask was then flushed with N<sub>2</sub>, and temperature ramped to 300 °C, at which point 4 mmol of dried and degassed oleylamine (70%, Sigma-Aldrich) from the glovebox were injected. The reaction was left at 300 °C for 1 hour, then cooled to RT and Au@ZnO structures purified following the same steps as reported above for the Au seeds.

### *Synthesis of Au/Cd-ZnO structures*

The synthesis was the same as described above for Au@ZnO, but Au/Cd seeds prepared as reported by Guardia *et al.*<sup>2</sup> were utilized instead of pure Au. Reaction was left at 300 °C for 5 minutes, then cooled to RT and purified as above.

### *Synthesis of pure ZnO*

The synthesis was the same as described above for Au@ZnO, but without Au seeds.

### *Characterization techniques*

TEM characterization was performed on a JEOL JEM 1400 operating at 120 kV, and on a Jeol JEM 2100 operating at 200 kV. Samples were prepared using 300 mesh carbon-coated Cu grids (Ted Pella, Inc.). UV-Vis spectra were recorded in transmission mode on a Cary 5000 spectrophotometer at 2 nm spectral bandwidth. XRD patterns were obtained on a Rigaku Smartlab diffractometer; patterns were measured in the  $2\theta$  range of 20-85 ° (Cu K $\alpha$  radiation,  $\lambda = 1.5418 \text{ \AA}$ ).

### *Catalytic characterization*

Steady state rates of CO oxidation reaction were measured in a 1/4-inch, quartz, tubular reactor, using 0.10 g of catalyst. All measurements were conducted at atmospheric pressure, with the partial pressures of CO and O<sub>2</sub> being 25 and 12.5 torr, respectively, and the balance being He. The total flow rate of the gas mixture was maintained at 120 mL min<sup>-1</sup>. Before testing, each sample was activated by heating to 320 °C at 5 °C min<sup>-1</sup> in the reaction mixture before cooling back to the desired reaction temperature. The composition of the reactor effluent was determined using an on-line gas chromatograph equipped with a HayeSep-D column and a thermal conductivity detector. All reported rates were measured with conversions below 15 % in order to ensure differential conditions.

The water-gas shift (WGS) experiments were performed with a similar setup in a 1/4-inch, quartz, tubular reactor, using 100 mg of catalyst. Water was introduced to the reactor by saturation of a He carrier gas flowing through deionized water. The reactant partial pressures were fixed at 25 torr CO and 25 torr H<sub>2</sub>O with a total flow rate of 120 ml min<sup>-1</sup>. In determining reaction rates, conversions of CH<sub>4</sub> or CO were kept well below 10% so that differential conditions could be assumed. Products were analyzed using an on-line gas chromatograph (SRI8610C) equipped with a Hayesep Q column and a TCD detector.

**Figure S1:** TEM images of several batches of Au@ZnO structures prepared with same reaction conditions that demonstrate the reproducibility of the synthesis method.

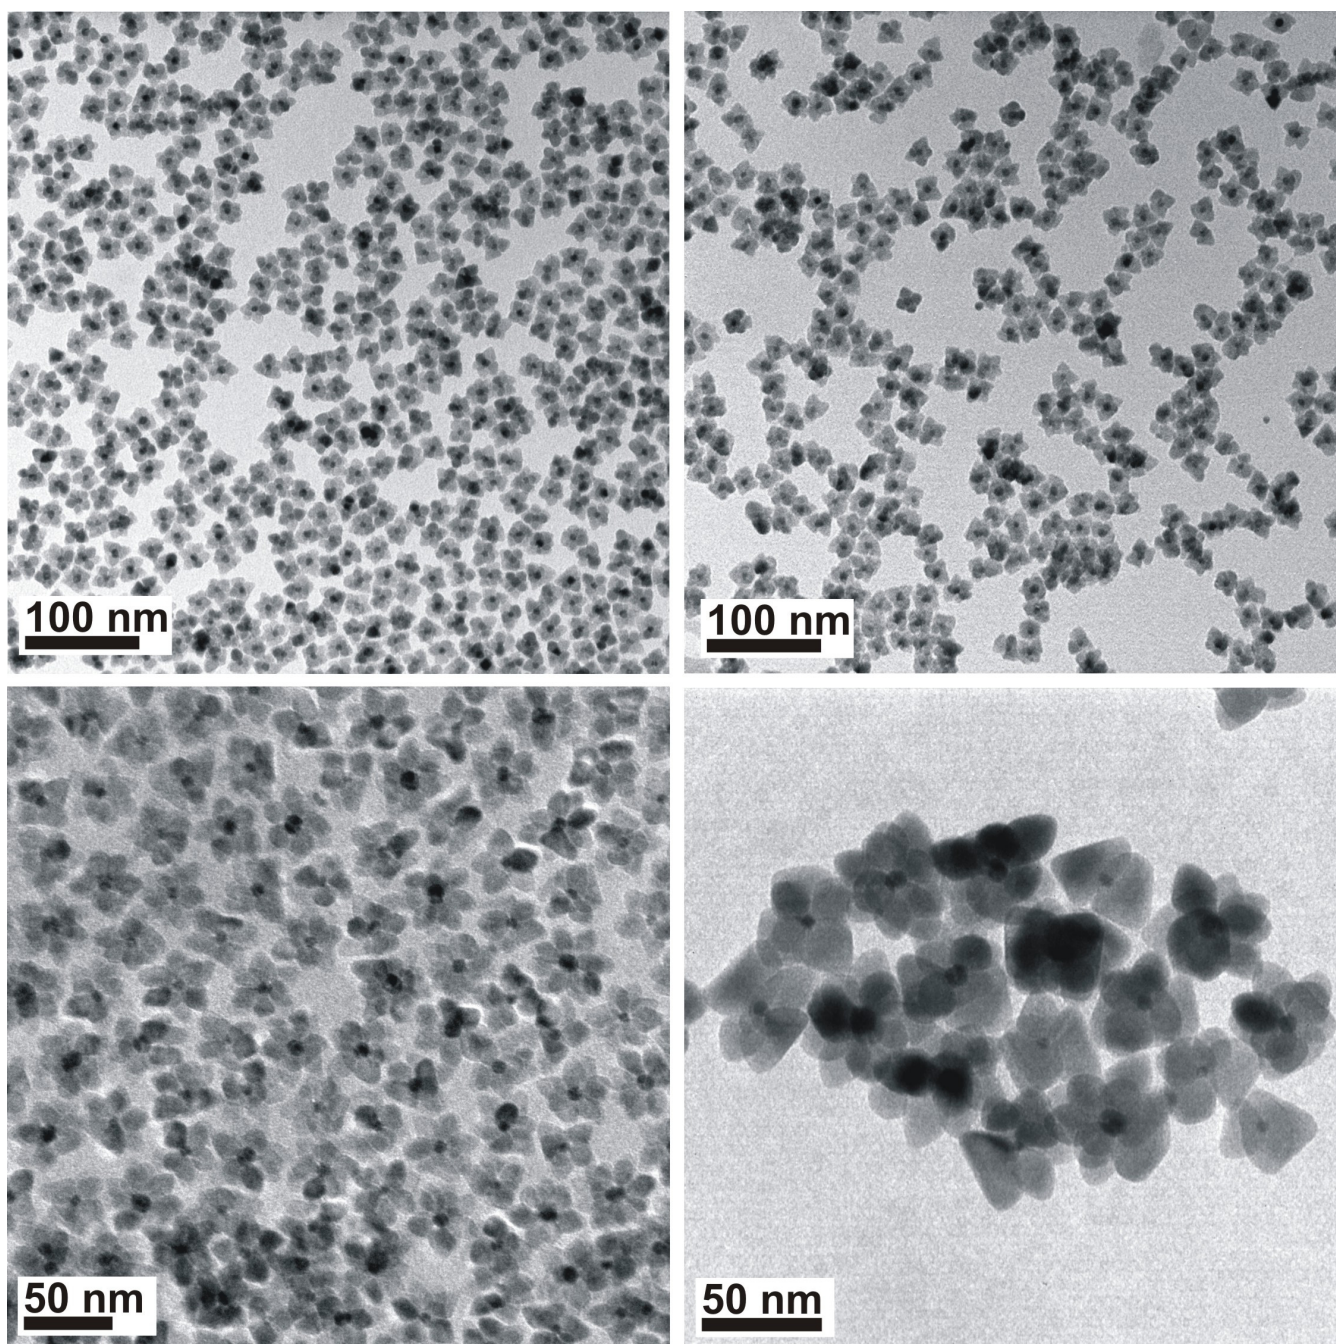

**Figure S2:** X-ray diffraction patterns of pure ZnO, Au@ZnO and Au/Cd-ZnO structures. For the Au/Cd@ZnO sample, a weak peak at  $\sim 40^\circ 2\theta$  demonstrates the formation of  $\text{Au}_2\text{Cd}$  intermetallic.

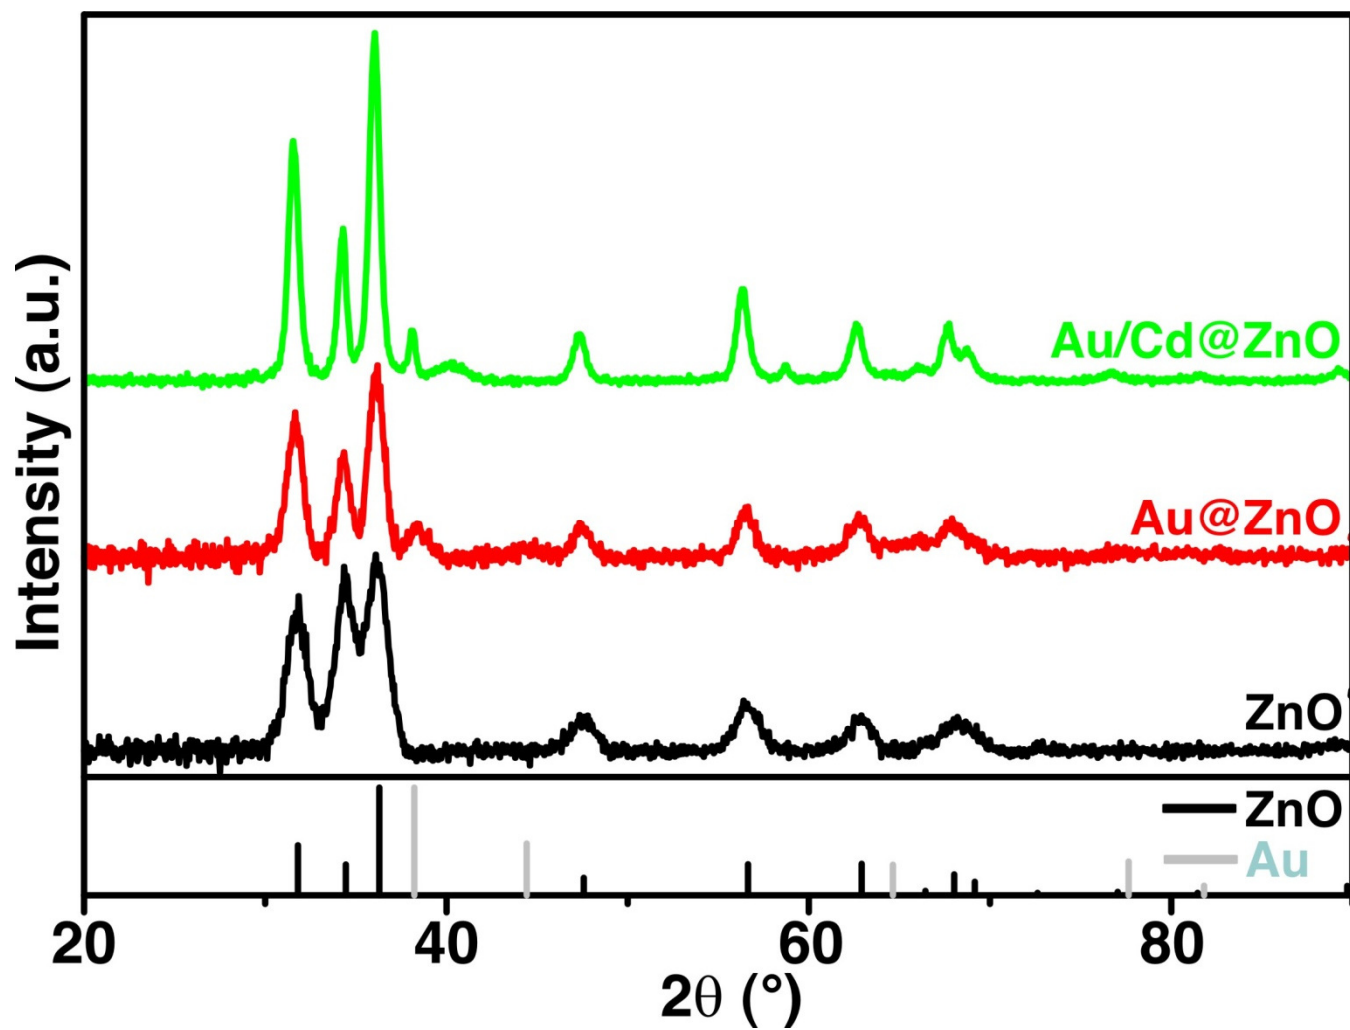

**Figure S3:** representative TEM images of the starting Au (a) and Au/Cd (b) seeds. The difference in crystallinity should be noticed, with pure Au rich in twinning defects and Au/Cd being single crystalline.

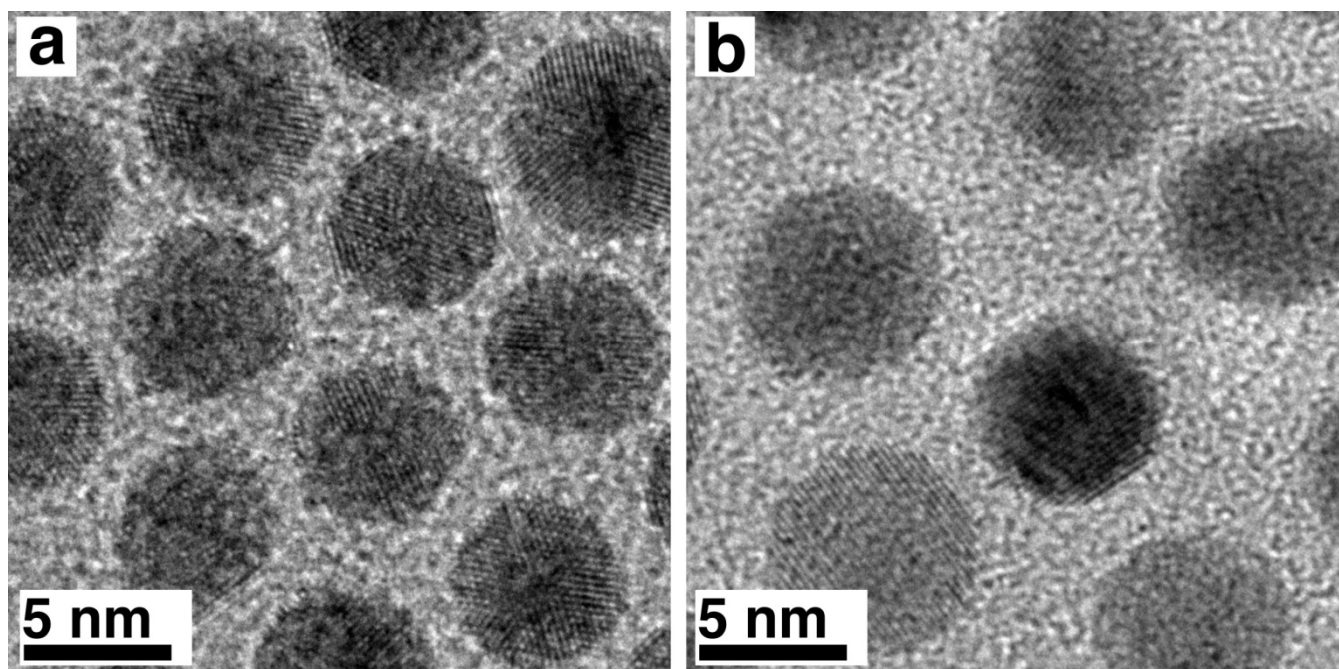

**Figure S4:** representative TEM images of Au@ZnO-Al<sub>2</sub>O<sub>3</sub> after catalytic reaction. Arrows point to structures where the core-shell system is still intact.

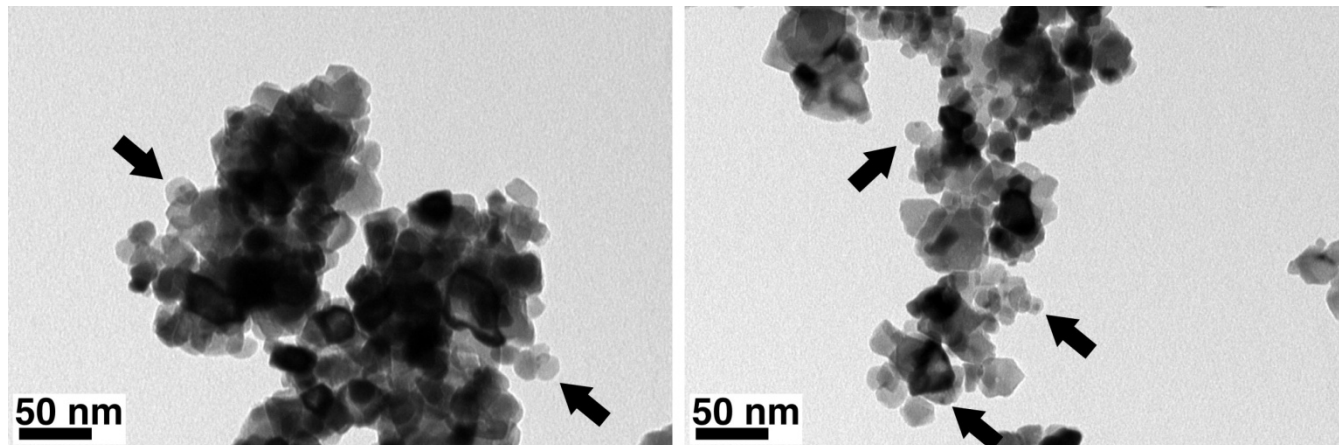

## References

1. S. Peng, Y. Lee, C. Wang, H. Yin, S. Dai, and S. Sun, *Nano Research*, 2008, **1**, 229-234.
2. P. Guardia, K. Korobchevskaya, A. Casu, A. Genovese, L. Manna, and A. Comin, *ACS Nano*, 2013, **7**, 1045-1053.
